# Supplementary material
Source: HighWire-hosted journal article supplement (https://jnm.snmjournals.org/highwire/filestream/94396/field_highwire_adjunct_files/0/114462_Supplemental_Data.pdf)
Supplement: 114462_Supplemental_Data.pdf [file 114462_Supplemental_Data.pdf]

**SUPPLEMENTAL TABLE 1. Categorized biological processes in the kidney cortex**

| Categories and subcategories                  | <sup>211</sup> At activity [kBq]: |            |           |          |           | No. (filtered transcripts) |
|-----------------------------------------------|-----------------------------------|------------|-----------|----------|-----------|----------------------------|
|                                               | 0.064                             | 0.64       | 1.8       | 14       | 42        |                            |
|                                               | Absorbed dose [mGy]:              |            |           |          |           |                            |
|                                               | 0.24                              | 2.4        | 6.9       | 52       | 160       |                            |
|                                               | No. (scored transcripts)          |            |           |          |           |                            |
| <b>DNA integrity</b>                          | <b>4</b>                          | <b>0</b>   | <b>0</b>  | <b>0</b> | <b>0</b>  | <b>109</b>                 |
| <b>Damage and repair</b>                      | <b>0</b>                          | <b>0</b>   | <b>0</b>  | <b>0</b> | <b>0</b>  | <b>30</b>                  |
| none                                          |                                   |            |           |          |           |                            |
| <b>Chromatin organization</b>                 | <b>4</b>                          | <b>0</b>   | <b>0</b>  | <b>0</b> | <b>0</b>  | <b>79</b>                  |
| chromatin modification                        | 4                                 |            |           |          |           |                            |
| <b>Gene expression integrity</b>              | <b>4</b>                          | <b>112</b> | <b>0</b>  | <b>0</b> | <b>0</b>  | <b>661</b>                 |
| <b>Transcription</b>                          | <b>2</b>                          | <b>103</b> | <b>0</b>  | <b>0</b> | <b>0</b>  | <b>567</b>                 |
| regulation of transcription; DNA-dependent    |                                   | 52         |           |          |           |                            |
| transcription                                 |                                   | 51         |           |          |           |                            |
| transcription from RNA polymerase II promoter | 2                                 |            |           |          |           |                            |
| <b>RNA processing</b>                         | <b>0</b>                          | <b>9</b>   | <b>0</b>  | <b>0</b> | <b>0</b>  | <b>64</b>                  |
| mRNA processing                               |                                   | 9          |           |          |           |                            |
| <b>Translation</b>                            | <b>2</b>                          | <b>0</b>   | <b>0</b>  | <b>0</b> | <b>0</b>  | <b>30</b>                  |
| regulation of translational initiation        | 2                                 |            |           |          |           |                            |
| <b>Cellular integrity</b>                     | <b>75</b>                         | <b>143</b> | <b>11</b> | <b>8</b> | <b>50</b> | <b>1054</b>                |
| <b>Physico-chemical environment</b>           | <b>2</b>                          | <b>35</b>  | <b>5</b>  | <b>6</b> | <b>22</b> | <b>174</b>                 |
| calcium ion homeostasis                       |                                   |            | 2         |          |           |                            |
| chloride transport                            |                                   | 5          | 2         |          | 2         |                            |
| copper ion homeostasis                        | 2                                 |            |           |          |           |                            |
| ion transport                                 |                                   | 25         |           |          | 12        |                            |
| potassium ion transport                       |                                   |            |           | 2        |           |                            |
| regulation of pH                              |                                   | 3          |           | 1        |           |                            |
| sodium ion transport                          |                                   |            |           | 3        | 7         |                            |
| thermoregulation                              |                                   | 2          | 1         |          |           |                            |
| water homeostasis                             |                                   |            |           |          | 1         |                            |
| <b>Cytoskeleton &amp; motility</b>            | <b>0</b>                          | <b>0</b>   | <b>0</b>  | <b>0</b> | <b>4</b>  | <b>139</b>                 |
| barbed-end actin filament capping             |                                   |            |           |          | 2         |                            |
| regulation of cell migration                  |                                   |            |           |          | 2         |                            |
| <b>Extracellular matrix &amp; CM</b>          | <b>0</b>                          | <b>0</b>   | <b>0</b>  | <b>0</b> | <b>2</b>  | <b>152</b>                 |
| calcium-independent cell-cell adhesion        |                                   |            |           |          | 2         |                            |
| <b>Supramolecular maintenance</b>             | <b>73</b>                         | <b>108</b> | <b>6</b>  | <b>2</b> | <b>22</b> | <b>589</b>                 |
| amiloride transport                           |                                   |            | 1         |          |           |                            |
| amino acid transport                          |                                   | 5          | 2         | 2        | 3         |                            |
| endosome to lysosome transport                | 2                                 | 2          |           |          |           |                            |
| intracellular protein transport               | 7                                 | 9          |           |          |           |                            |
| negative regulation of enzyme activity        |                                   |            | 1         |          |           |                            |
| protein complex assembly                      |                                   |            | 2         |          | 2         |                            |
| protein folding                               |                                   | 14         |           |          |           |                            |
| transport                                     | 64                                | 78         |           |          | 17        |                            |
| <b>Cell cycle and differentiation</b>         | <b>9</b>                          | <b>8</b>   | <b>9</b>  | <b>0</b> | <b>3</b>  | <b>510</b>                 |
| <b>Cell cycle regulation</b>                  | <b>0</b>                          | <b>0</b>   | <b>0</b>  | <b>0</b> | <b>0</b>  | <b>290</b>                 |
| none                                          |                                   |            |           |          |           |                            |
| <b>Differentiation &amp; aging</b>            | <b>7</b>                          | <b>4</b>   | <b>7</b>  | <b>0</b> | <b>0</b>  | <b>50</b>                  |

|                                                                  |           |           |           |          |          |            |
|------------------------------------------------------------------|-----------|-----------|-----------|----------|----------|------------|
| erythrocyte maturation                                           |           |           |           | 1        |          |            |
| eye photoreceptor cell differentiation                           |           |           |           | 1        |          |            |
| keratinocyte differentiation                                     | 3         | 4         |           |          |          |            |
| neuron differentiation                                           | 4         |           |           | 2        |          |            |
| neuron maturation                                                |           |           |           | 1        |          |            |
| positive regulation of axon extension                            |           |           |           | 1        |          |            |
| regulation of axon extension                                     |           |           |           | 1        |          |            |
| <b>Apoptotic cell death</b>                                      | <b>2</b>  | <b>2</b>  | <b>0</b>  | <b>0</b> | <b>3</b> | <b>155</b> |
| apoptotic mitochondrial changes                                  | 2         | 2         |           |          |          |            |
| negative regulation of apoptosis                                 |           |           |           |          | 3        |            |
| <b>Cell death</b>                                                | <b>0</b>  | <b>0</b>  | <b>2</b>  | <b>0</b> | <b>0</b> | <b>13</b>  |
| cytolysis                                                        |           |           | 2         |          |          |            |
| <b>General</b>                                                   | <b>0</b>  | <b>2</b>  | <b>0</b>  | <b>0</b> | <b>0</b> | <b>2</b>   |
| regulation of cellular process                                   |           | 2         |           |          |          |            |
| <b>Cell communication</b>                                        | <b>2</b>  | <b>10</b> | <b>12</b> | <b>1</b> | <b>5</b> | <b>381</b> |
| <b>Intercellular signaling</b>                                   | <b>2</b>  | <b>2</b>  | <b>3</b>  | <b>0</b> | <b>0</b> | <b>16</b>  |
| nerve-nerve synaptic transmission                                | 2         |           |           |          |          |            |
| neuromuscular synaptic transmission                              |           | 2         |           |          |          |            |
| regulation of neuronal synaptic plasticity                       |           |           | 1         |          |          |            |
| synaptic transmission; cholinergic                               |           |           | 2         |          |          |            |
| <b>Signal transduction</b>                                       | <b>0</b>  | <b>8</b>  | <b>9</b>  | <b>1</b> | <b>5</b> | <b>365</b> |
| cytokine and chemokine mediated signaling pathway                |           |           | 2         |          |          |            |
| ER-nuclear signaling pathway                                     |           |           | 1         |          |          |            |
| gamma-aminobutyric acid signaling pathway                        |           |           | 1         |          |          |            |
| positive regulation of signal transduction                       |           |           | 1         |          |          |            |
| positive regulation of small GTPase mediated signal transduction |           |           |           |          | 1        |            |
| protein amino acid dephosphorylation                             |           | 8         | 3         |          |          |            |
| Toll signaling pathway                                           |           |           | 1         |          |          |            |
| transmembrane receptor protein tyrosine kinase signaling pathway |           |           |           |          | 4        |            |
| two-component signal transduction system (phosphorelay)          |           |           |           | 1        |          |            |
| <b>Metabolism</b>                                                | <b>71</b> | <b>81</b> | <b>11</b> | <b>2</b> | <b>2</b> | <b>828</b> |
| <b>Proteins, amino acids</b>                                     | <b>0</b>  | <b>0</b>  | <b>1</b>  | <b>0</b> | <b>0</b> | <b>62</b>  |
| tryptophan catabolism                                            |           |           | 1         |          |          |            |
| <b>Lipids, fatty acids</b>                                       | <b>9</b>  | <b>48</b> | <b>5</b>  | <b>2</b> | <b>2</b> | <b>292</b> |
| acetyl-CoA metabolism                                            |           | 2         |           |          |          |            |
| acyl-CoA metabolism                                              |           | 4         |           |          |          |            |
| cholesterol metabolism                                           |           | 6         |           |          |          |            |
| fatty acid metabolism                                            | 7         | 10        |           |          |          |            |
| fatty acid oxidation                                             |           | 3         |           |          |          |            |
| lipid metabolism                                                 |           | 17        |           |          |          |            |
| lipoprotein metabolism                                           |           |           | 2         |          |          |            |
| malate metabolism                                                | 2         |           |           |          |          |            |
| negative regulation of lipoprotein lipase activity               |           |           | 1         | 1        | 1        |            |
| positive regulation of fatty acid metabolism                     |           |           | 1         |          |          |            |
| positive regulation of lipid metabolism                          |           |           | 1         | 1        |          |            |
| sphingoid catabolism                                             |           |           |           |          | 1        |            |

|                                                           |           |           |           |          |           |  |     |
|-----------------------------------------------------------|-----------|-----------|-----------|----------|-----------|--|-----|
| steroid metabolism                                        |           |           | 6         |          |           |  |     |
| <b>Carbohydrates</b>                                      | <b>2</b>  | <b>0</b>  | <b>5</b>  | <b>0</b> | <b>0</b>  |  | 33  |
| glucose homeostasis                                       |           |           | 2         |          |           |  |     |
| glycogen biosynthesis                                     | 2         |           |           |          |           |  |     |
| negative regulation of gluconeogenesis                    |           |           | 1         |          |           |  |     |
| positive regulation of glucose import                     |           |           | 1         |          |           |  |     |
| response to glucose stimulus                              |           |           | 1         |          |           |  |     |
| <b>Signaling molecules</b>                                | <b>0</b>  | <b>2</b>  | <b>0</b>  | <b>0</b> | <b>0</b>  |  | 18  |
| positive regulation of nitric oxide biosynthesis          |           | 2         |           |          |           |  |     |
| <b>Nucleic acid-related</b>                               | <b>0</b>  | <b>0</b>  | <b>0</b>  | <b>0</b> | <b>0</b>  |  | 32  |
| none                                                      |           |           |           |          |           |  |     |
| <b>Other</b>                                              | <b>2</b>  | <b>2</b>  | <b>0</b>  | <b>0</b> | <b>0</b>  |  | 41  |
| retinoic acid metabolism                                  | 2         | 2         |           |          |           |  |     |
| <b>General</b>                                            | <b>58</b> | <b>29</b> | <b>0</b>  | <b>0</b> | <b>0</b>  |  | 350 |
| ATP biosynthesis                                          |           |           |           |          |           |  |     |
| ATP synthesis coupled proton transport                    |           |           |           |          |           |  |     |
| cellular respiration                                      |           |           |           |          |           |  |     |
| electron transport                                        | 27        | 29        |           |          |           |  |     |
| energy reserve metabolism                                 |           |           |           |          |           |  |     |
| metabolism                                                | 28        |           |           |          |           |  |     |
| oxygen transport                                          | 3         |           |           |          |           |  |     |
| regulation of metabolism                                  |           |           |           |          |           |  |     |
| <b>Stress responses</b>                                   | <b>2</b>  | <b>13</b> | <b>37</b> | <b>5</b> | <b>21</b> |  | 450 |
| <b>Oxidative stress response</b>                          | <b>0</b>  | <b>0</b>  | <b>0</b>  | <b>0</b> | <b>0</b>  |  | 24  |
| none                                                      |           |           |           |          |           |  |     |
| <b>Inflammatory response</b>                              | <b>0</b>  | <b>0</b>  | <b>0</b>  | <b>0</b> | <b>0</b>  |  | 41  |
| none                                                      |           |           |           |          |           |  |     |
| <b>Immune response</b>                                    | <b>2</b>  | <b>2</b>  | <b>36</b> | <b>4</b> | <b>21</b> |  | 298 |
| defense response                                          |           |           | 8         | 4        |           |  |     |
| immune response                                           |           |           | 14        | 4        | 10        |  |     |
| innate immune response                                    |           |           | 4         |          |           |  |     |
| positive regulation of immune response                    |           |           | 2         | 2        |           |  |     |
| positive regulation of interleukin-12 biosynthesis        |           |           | 1         |          |           |  |     |
| positive regulation of T cell differentiation             |           |           | 2         | 2        |           |  |     |
| positive thymic T cell selection                          |           |           | 2         | 2        |           |  |     |
| protection from natural killer cell mediated cytotoxicity |           |           | 1         |          |           |  |     |
| regulation of interleukin-6 biosynthesis                  |           |           | 1         | 1        |           |  |     |
| regulation of macrophage activation                       | 2         | 2         | 1         |          |           |  |     |
| <b>Other</b>                                              | <b>0</b>  | <b>11</b> | <b>1</b>  | <b>1</b> | <b>0</b>  |  | 87  |
| cellular response to starvation                           |           |           |           | 1        |           |  |     |
| response to heat                                          |           | 4         |           |          |           |  |     |
| response to sterol depletion                              |           |           | 1         |          |           |  |     |
| response to unfolded protein                              |           | 7         |           |          |           |  |     |
| <b>Organismic regulation</b>                              | <b>3</b>  | <b>9</b>  | <b>2</b>  | <b>4</b> | <b>7</b>  |  | 166 |
| <b>Behavior</b>                                           | <b>0</b>  | <b>0</b>  | <b>1</b>  | <b>0</b> | <b>0</b>  |  | 8   |
| behavior                                                  |           |           | 1         |          |           |  |     |
| <b>Ontogenesis</b>                                        | <b>0</b>  | <b>4</b>  | <b>0</b>  | <b>1</b> | <b>5</b>  |  | 97  |

|                                       |          |          |          |          |          |           |
|---------------------------------------|----------|----------|----------|----------|----------|-----------|
| brain development                     |          |          |          |          |          | 3         |
| odontogenesis (sensu Vertebrata)      |          | 4        |          |          |          |           |
| patterning of blood vessels           |          |          |          |          |          | 2         |
| positive regulation of angiogenesis   |          |          |          |          | 1        |           |
| <b>Systemic regulation</b>            | <b>0</b> | <b>2</b> | <b>1</b> | <b>3</b> | <b>2</b> | <b>53</b> |
| circadian rhythm                      |          |          |          | 1        |          |           |
| intestinal absorption                 |          | 2        |          |          |          |           |
| negative regulation of blood pressure |          |          |          |          |          | 1         |
| regulation of body fluids             |          |          |          |          |          | 1         |
| rhythmic process                      |          |          |          | 2        |          |           |
| vasodilation                          |          |          | 1        |          |          |           |
| <b>Reproduction</b>                   | <b>3</b> | <b>3</b> | <b>0</b> | <b>0</b> | <b>0</b> | <b>8</b>  |
| sexual reproduction                   | 3        | 3        |          |          |          |           |

**SUPPLEMENTAL TABLE 2. Categorized processes in the kidney medulla**

| Categories and subcategories                             | <sup>211</sup> At activity [kBq]: |            |           |          |          | No. (filtered transcripts) |
|----------------------------------------------------------|-----------------------------------|------------|-----------|----------|----------|----------------------------|
|                                                          | 0.064                             | 0.64       | 1.8       | 14       | 42       |                            |
|                                                          | Absorbed dose [mGy]:              |            |           |          |          |                            |
|                                                          | 0.24                              | 2.4        | 6.9       | 52       | 160      |                            |
|                                                          | No. (scored transcripts)          |            |           |          |          |                            |
|                                                          | 0                                 | 3          | 17        | 0        | 0        |                            |
| <b>DNA integrity</b>                                     | <b>0</b>                          | <b>3</b>   | <b>17</b> | <b>0</b> | <b>0</b> | <b>109</b>                 |
| <b>Damage and repair</b>                                 | <b>0</b>                          | <b>0</b>   | <b>0</b>  | <b>0</b> | <b>0</b> | <b>30</b>                  |
| none                                                     |                                   |            |           |          |          |                            |
| <b>Chromatin organization</b>                            | <b>0</b>                          | <b>3</b>   | <b>17</b> | <b>0</b> | <b>0</b> | <b>79</b>                  |
| chromosome organization and biogenesis (sensu Eukaryota) |                                   |            | 8         |          |          |                            |
| nucleosome assembly                                      |                                   |            | 9         |          |          |                            |
| telomere maintenance                                     |                                   | 3          |           |          |          |                            |
| <b>Gene expression integrity</b>                         | <b>21</b>                         | <b>21</b>  | <b>5</b>  | <b>0</b> | <b>2</b> | <b>661</b>                 |
| <b>Transcription</b>                                     | <b>0</b>                          | <b>0</b>   | <b>0</b>  | <b>0</b> | <b>1</b> | <b>567</b>                 |
| transcription from RNA polymerase II promoter            |                                   |            |           |          | 1        |                            |
| <b>RNA processing</b>                                    | <b>17</b>                         | <b>11</b>  | <b>0</b>  | <b>0</b> | <b>0</b> | <b>64</b>                  |
| mRNA processing                                          | 11                                | 11         |           |          |          |                            |
| rRNA processing                                          | 6                                 |            |           |          |          |                            |
| <b>Translation</b>                                       | <b>4</b>                          | <b>10</b>  | <b>5</b>  | <b>0</b> | <b>1</b> | <b>30</b>                  |
| regulation of protein biosynthesis                       | 4                                 | 5          |           |          |          |                            |
| regulation of translation                                |                                   | 5          |           |          |          |                            |
| regulation of translational initiation                   |                                   |            | 2         |          | 1        |                            |
| translational elongation                                 |                                   |            |           |          |          |                            |
| translational initiation                                 |                                   |            | 3         |          |          |                            |
| <b>Cellular integrity</b>                                | <b>110</b>                        | <b>128</b> | <b>29</b> | <b>3</b> | <b>6</b> | <b>1054</b>                |
| <b>Physico-chemical environment</b>                      | <b>2</b>                          | <b>2</b>   | <b>23</b> | <b>0</b> | <b>3</b> | <b>174</b>                 |
| ion transport                                            |                                   |            | 14        |          |          |                            |
| metal ion homeostasis                                    |                                   |            |           |          | 1        |                            |
| regulation of pH                                         |                                   |            | 2         |          |          |                            |
| sodium ion transport                                     |                                   |            | 7         |          |          |                            |
| thermoregulation                                         | 2                                 | 2          |           |          | 1        |                            |
| zinc ion homeostasis                                     |                                   |            |           |          | 1        |                            |
| <b>Cytoskeleton &amp; motility</b>                       | <b>2</b>                          | <b>4</b>   | <b>4</b>  | <b>2</b> | <b>2</b> | <b>139</b>                 |
| chemotaxis                                               |                                   |            |           | 2        |          |                            |
| cortical actin cytoskeleton organization and biogenesis  |                                   |            |           |          | 1        |                            |
| induction of positive chemotaxis                         |                                   |            | 2         |          |          |                            |
| motor axon guidance                                      | 2                                 | 2          |           |          |          |                            |
| positive regulation of cell migration                    |                                   |            | 2         |          |          |                            |
| substrate-bound cell migration; cell extension           |                                   | 2          |           |          | 1        |                            |
| <b>Extracellular matrix &amp; CM</b>                     | <b>6</b>                          | <b>0</b>   | <b>0</b>  | <b>0</b> | <b>0</b> | <b>152</b>                 |
| cell-matrix adhesion                                     | 6                                 |            |           |          |          |                            |
| <b>Supramolecular maintenance</b>                        | <b>100</b>                        | <b>122</b> | <b>2</b>  | <b>1</b> | <b>1</b> | <b>589</b>                 |
| intracellular transport                                  |                                   |            |           | 1        |          |                            |
| oligopeptide transport                                   |                                   |            | 2         |          |          |                            |
| protein folding                                          |                                   | 17         |           |          |          |                            |
| protein targeting                                        | 8                                 |            |           |          |          |                            |
| protein targeting to membrane                            |                                   |            |           |          | 1        |                            |

|                                                         |            |           |           |          |          |            |
|---------------------------------------------------------|------------|-----------|-----------|----------|----------|------------|
| sequestering of lipid                                   | 3          | 3         |           |          |          |            |
| transport                                               | 89         | 89        |           |          |          |            |
| ubiquitin cycle                                         |            |           |           |          | 13       |            |
| <b>Cell cycle and differentiation</b>                   | <b>24</b>  | <b>18</b> | <b>2</b>  | <b>2</b> | <b>9</b> | <b>510</b> |
| <b>Cell cycle regulation</b>                            | <b>9</b>   | <b>4</b>  | <b>0</b>  | <b>0</b> | <b>1</b> | <b>290</b> |
| cell growth                                             | 4          | 4         |           |          |          |            |
| regulation of body size                                 |            |           |           |          | 1        |            |
| regulation of mitosis                                   | 2          |           |           |          |          |            |
| somatic stem cell division                              | 3          |           |           |          |          |            |
| <b>Differentiation &amp; aging</b>                      | <b>7</b>   | <b>6</b>  | <b>2</b>  | <b>2</b> | <b>4</b> | <b>50</b>  |
| aging                                                   | 2          | 2         |           |          |          |            |
| cell fate determination                                 |            |           |           | 1        | 1        |            |
| endothelial cell differentiation                        |            |           |           | 1        | 1        |            |
| eye photoreceptor cell differentiation                  |            |           |           |          | 1        |            |
| keratinocyte differentiation                            | 5          | 4         |           |          |          |            |
| positive regulation of fibroblast proliferation         |            |           | 2         |          | 1        |            |
| <b>Apoptotic cell death</b>                             | <b>2</b>   | <b>2</b>  | <b>0</b>  | <b>0</b> | <b>2</b> | <b>155</b> |
| apoptotic mitochondrial changes                         | 2          | 2         |           |          |          |            |
| negative regulation of apoptosis                        |            |           |           |          | 2        |            |
| <b>Cell death</b>                                       | <b>6</b>   | <b>6</b>  | <b>0</b>  | <b>0</b> | <b>2</b> | <b>13</b>  |
| cytolysis                                               | 6          | 6         |           |          | 2        |            |
| <b>General</b>                                          | <b>0</b>   | <b>0</b>  | <b>0</b>  | <b>0</b> | <b>0</b> | <b>2</b>   |
| none                                                    |            |           |           |          |          |            |
| <b>Cell communication</b>                               | <b>2</b>   | <b>4</b>  | <b>0</b>  | <b>8</b> | <b>3</b> | <b>381</b> |
| <b>Intercellular signaling</b>                          | <b>2</b>   | <b>4</b>  | <b>0</b>  | <b>0</b> | <b>0</b> | <b>16</b>  |
| neuromuscular synaptic transmission                     | 2          | 2         |           |          |          |            |
| synaptic vesicle transport                              |            | 2         |           |          |          |            |
| <b>Signal transduction</b>                              | <b>0</b>   | <b>0</b>  | <b>0</b>  | <b>8</b> | <b>3</b> | <b>365</b> |
| activation of MAPKK activity                            |            |           |           |          | 1        |            |
| BMP signaling pathway                                   |            |           |           | 1        |          |            |
| neuropeptide signaling pathway                          |            |           |           | 1        |          |            |
| nitric oxide mediated signal transduction               |            |           |           |          | 1        |            |
| phosphorylation                                         |            |           |           | 1        |          |            |
| signal transduction                                     |            |           |           | 4        |          |            |
| two-component signal transduction system (phosphorelay) |            |           |           | 1        | 1        |            |
| <b>Metabolism</b>                                       | <b>108</b> | <b>63</b> | <b>32</b> | <b>5</b> | <b>8</b> | <b>828</b> |
| <b>Proteins, amino acids</b>                            | <b>3</b>   | <b>0</b>  | <b>3</b>  | <b>0</b> | <b>0</b> | <b>62</b>  |
| cellular protein metabolism                             | 3          |           | 3         |          |          |            |
| <b>Lipids, fatty acids</b>                              | <b>7</b>   | <b>8</b>  | <b>12</b> | <b>3</b> | <b>8</b> | <b>292</b> |
| acetyl-CoA biosynthesis from pyruvate                   |            |           |           | 1        | 1        |            |
| acetyl-CoA metabolism                                   |            |           |           |          | 1        |            |
| cholesterol biosynthesis                                |            |           | 3         |          |          |            |
| fatty acid beta-oxidation                               |            |           | 3         |          |          |            |
| fatty acid catabolism                                   |            |           |           |          | 1        |            |
| fatty acid metabolism                                   |            |           | 6         |          | 2        |            |
| fatty acid oxidation                                    | 3          | 3         |           |          |          |            |
| long-chain fatty acid transport                         | 2          | 2         |           |          |          |            |

|                                                    |           |           |           |          |          |            |
|----------------------------------------------------|-----------|-----------|-----------|----------|----------|------------|
| negative regulation of lipoprotein lipase activity |           |           |           | 1        | 1        |            |
| phosphatidylcholine biosynthesis                   |           | 3         |           |          |          |            |
| positive regulation of lipid metabolism            | 2         |           |           | 1        | 1        |            |
| sphingoid catabolism                               |           |           |           |          | 1        |            |
| <b>Carbohydrates</b>                               | <b>0</b>  | <b>0</b>  | <b>0</b>  | <b>0</b> | <b>0</b> | <b>33</b>  |
| none                                               |           |           |           |          |          |            |
| <b>Signaling molecules</b>                         | <b>5</b>  | <b>7</b>  | <b>0</b>  | <b>0</b> | <b>0</b> | <b>18</b>  |
| dopamine biosynthesis                              |           | 2         |           |          |          |            |
| positive regulation of nitric oxide biosynthesis   | 2         | 2         |           |          |          |            |
| prostaglandin biosynthesis                         | 3         | 3         |           |          |          |            |
| <b>Nucleic acid-related</b>                        | <b>4</b>  | <b>2</b>  | <b>0</b>  | <b>0</b> | <b>0</b> | <b>32</b>  |
| deoxyribonucleotide catabolism                     | 2         |           |           |          |          |            |
| DNA catabolism                                     | 2         | 2         |           |          |          |            |
| <b>Other</b>                                       | <b>4</b>  | <b>5</b>  | <b>0</b>  | <b>2</b> | <b>0</b> | <b>41</b>  |
| aromatic compound catabolism                       |           | 3         |           |          |          |            |
| carotenoid biosynthesis                            | 2         |           |           |          |          |            |
| hyaluronan metabolism                              |           |           |           | 1        |          |            |
| isoprenoid biosynthesis                            |           |           |           | 1        |          |            |
| retinoic acid metabolism                           | 2         | 2         |           |          |          |            |
| <b>General</b>                                     | <b>85</b> | <b>41</b> | <b>17</b> | <b>0</b> | <b>0</b> | <b>350</b> |
| electron transport                                 | 37        |           | 17        |          |          |            |
| energy reserve metabolism                          | 2         |           |           |          |          |            |
| metabolism                                         | 46        | 41        |           |          |          |            |
| <b>Stress responses</b>                            | <b>16</b> | <b>12</b> | <b>3</b>  | <b>5</b> | <b>3</b> | <b>450</b> |
| <b>Oxidative stress response</b>                   | <b>0</b>  | <b>0</b>  | <b>0</b>  | <b>0</b> | <b>0</b> | <b>24</b>  |
| none                                               |           |           |           |          |          |            |
| <b>Inflammatory response</b>                       | <b>0</b>  | <b>0</b>  | <b>0</b>  | <b>3</b> | <b>0</b> | <b>41</b>  |
| inflammatory response                              |           |           |           | 3        |          |            |
| <b>Immune response</b>                             | <b>5</b>  | <b>2</b>  | <b>0</b>  | <b>0</b> | <b>2</b> | <b>298</b> |
| interferon-gamma biosynthesis                      |           |           |           |          | 1        |            |
| positive regulation of immune response             | 3         |           |           |          |          |            |
| positive regulation of myoblast differentiation    |           |           |           |          | 1        |            |
| regulation of macrophage activation                | 2         | 2         |           |          |          |            |
| <b>Other</b>                                       | <b>11</b> | <b>10</b> | <b>3</b>  | <b>2</b> | <b>1</b> | <b>87</b>  |
| cellular response to starvation                    |           |           |           | 1        | 1        |            |
| response to hypoxia                                |           |           | 3         | 1        |          |            |
| response to unfolded protein                       | 8         | 7         |           |          |          |            |
| wound healing                                      | 3         | 3         |           |          |          |            |
| <b>Organismic regulation</b>                       | <b>5</b>  | <b>8</b>  | <b>5</b>  | <b>4</b> | <b>5</b> | <b>166</b> |
| <b>Behavior</b>                                    | <b>0</b>  | <b>0</b>  | <b>0</b>  | <b>0</b> | <b>1</b> | <b>8</b>   |
| eating behavior                                    |           |           |           |          | 1        |            |
| <b>Ontogenesis</b>                                 | <b>0</b>  | <b>3</b>  | <b>3</b>  | <b>2</b> | <b>1</b> | <b>97</b>  |
| brain development                                  |           |           | 3         |          |          |            |
| embryo implantation                                |           | 3         |           |          |          |            |
| positive regulation of angiogenesis                |           |           |           | 1        | 1        |            |
| regulation of angiogenesis                         |           |           |           | 1        |          |            |
| <b>Systemic regulation</b>                         | <b>2</b>  | <b>2</b>  | <b>0</b>  | <b>2</b> | <b>2</b> | <b>53</b>  |

|                                   |          |          |          |          |          |          |
|-----------------------------------|----------|----------|----------|----------|----------|----------|
| circadian rhythm                  |          |          |          | 1        | 1        |          |
| intestinal absorption             | 2        | 2        |          |          |          |          |
| regulation of bone mineralization |          |          |          |          | 1        |          |
| rhythmic process                  |          |          |          | 1        |          |          |
| <b>Reproduction</b>               | <b>3</b> | <b>3</b> | <b>2</b> | <b>0</b> | <b>1</b> | <b>8</b> |
| sexual reproduction               | 3        | 3        | 2        |          | 1        |          |



**SUPPLEMENTAL TABLE 3. Categorized processes in the liver**

| Categories and subcategories               | <sup>211</sup> At activity [kBq]: |            |          |          |          | No. (filtered transcripts) |
|--------------------------------------------|-----------------------------------|------------|----------|----------|----------|----------------------------|
|                                            | 0.064                             | 0.64       | 1.8      | 14       | 42       |                            |
|                                            | Absorbed dose [mGy]:              |            |          |          |          |                            |
|                                            | 0.20                              |            |          |          |          | 2.0                        |
|                                            | 5.5                               |            |          |          |          | 44                         |
|                                            | 130                               |            |          |          |          |                            |
|                                            | No. (scored transcripts)          |            |          |          |          |                            |
| <b>DNA integrity</b>                       | <b>0</b>                          | <b>0</b>   | <b>1</b> | <b>0</b> | <b>1</b> | <b>109</b>                 |
| <b>Damage and repair</b>                   | <b>0</b>                          | <b>0</b>   | <b>0</b> | <b>0</b> | <b>0</b> | <b>30</b>                  |
| none                                       |                                   |            |          |          |          |                            |
| <b>Chromatin organization</b>              | <b>0</b>                          | <b>0</b>   | <b>1</b> | <b>0</b> | <b>1</b> | <b>79</b>                  |
| nucleosome spacing                         |                                   |            | 1        |          | 1        |                            |
| <b>Gene expression integrity</b>           | <b>115</b>                        | <b>145</b> | <b>0</b> | <b>0</b> | <b>0</b> | <b>661</b>                 |
| <b>Transcription</b>                       | <b>96</b>                         | <b>118</b> | <b>0</b> | <b>0</b> | <b>0</b> | <b>567</b>                 |
| regulation of transcription; DNA-dependent | 49                                | 59         |          |          |          |                            |
| transcription                              | 47                                | 59         |          |          |          |                            |
| <b>RNA processing</b>                      | <b>17</b>                         | <b>18</b>  | <b>0</b> | <b>0</b> | <b>0</b> | <b>64</b>                  |
| mRNA processing                            | 11                                | 11         |          |          |          |                            |
| nuclear mRNA splicing; via spliceosome     | 6                                 | 7          |          |          |          |                            |
| <b>Translation</b>                         | <b>2</b>                          | <b>9</b>   | <b>0</b> | <b>0</b> | <b>0</b> | <b>30</b>                  |
| regulation of protein biosynthesis         |                                   | 5          |          |          |          |                            |
| regulation of translation                  |                                   | 4          |          |          |          |                            |
| regulation of translational initiation     | 2                                 |            |          |          |          |                            |
| <b>Cellular integrity</b>                  | <b>35</b>                         | <b>19</b>  | <b>6</b> | <b>9</b> | <b>6</b> | <b>1054</b>                |
| <b>Physico-chemical environment</b>        | <b>5</b>                          | <b>9</b>   | <b>1</b> | <b>4</b> | <b>3</b> | <b>174</b>                 |
| cation transport                           |                                   |            |          |          | 2        |                            |
| cell redox homeostasis                     | 3                                 |            |          |          |          |                            |
| iron ion homeostasis                       |                                   |            |          | 2        |          |                            |
| metal ion homeostasis                      |                                   |            | 1        | 1        | 1        |                            |
| molecular hydrogen transport               |                                   |            |          | 1        |          |                            |
| proton transport                           |                                   | 7          |          |          |          |                            |
| thermoregulation                           | 2                                 | 2          |          |          |          |                            |
| <b>Cytoskeleton &amp; motility</b>         | <b>0</b>                          | <b>10</b>  | <b>0</b> | <b>5</b> | <b>3</b> | <b>139</b>                 |
| chemotaxis                                 |                                   |            |          |          |          |                            |
| microtubule-based movement                 |                                   | 7          |          | 3        | 3        |                            |
| microtubule-based process                  |                                   |            |          | 2        |          |                            |
| positive regulation of cell migration      |                                   | 3          |          |          |          |                            |
| <b>Extracellular matrix &amp; CM</b>       | <b>0</b>                          | <b>0</b>   | <b>0</b> | <b>0</b> | <b>0</b> | <b>152</b>                 |
| none                                       |                                   |            |          |          |          |                            |
| <b>Supramolecular maintenance</b>          | <b>30</b>                         | <b>0</b>   | <b>5</b> | <b>0</b> | <b>0</b> | <b>589</b>                 |
| protein folding                            | 13                                |            | 5        |          |          |                            |
| protein modification                       | 5                                 |            |          |          |          |                            |
| transport                                  |                                   |            |          |          |          |                            |
| ubiquitin cycle                            | 12                                |            |          |          |          |                            |
| <b>Cell cycle and differentiation</b>      | <b>33</b>                         | <b>22</b>  | <b>6</b> | <b>5</b> | <b>4</b> | <b>510</b>                 |
| <b>Cell cycle regulation</b>               | <b>0</b>                          | <b>0</b>   | <b>4</b> | <b>0</b> | <b>0</b> | <b>290</b>                 |
| regulation of cell growth                  |                                   |            | 4        |          |          |                            |
| <b>Differentiation &amp; aging</b>         | <b>6</b>                          | <b>4</b>   | <b>2</b> | <b>2</b> | <b>1</b> | <b>50</b>                  |
| keratinocyte differentiation               | 4                                 | 4          |          |          |          |                            |

|                                                                  |           |            |           |           |           |     |
|------------------------------------------------------------------|-----------|------------|-----------|-----------|-----------|-----|
| mechanoreceptor differentiation                                  |           |            |           | 1         |           |     |
| mesoderm development                                             | 2         |            |           |           |           |     |
| positive regulation of neuron differentiation                    |           |            | 1         |           |           |     |
| retinal rod cell development                                     |           |            | 1         | 1         | 1         |     |
| <b>Apoptotic cell death</b>                                      | <b>22</b> | <b>18</b>  | <b>0</b>  | <b>3</b>  | <b>3</b>  | 155 |
| apoptosis                                                        | 16        | 18         |           |           |           |     |
| negative regulation of apoptosis                                 | 6         |            |           | 3         | 3         |     |
| <b>Cell death</b>                                                | <b>5</b>  | <b>0</b>   | <b>0</b>  | <b>0</b>  | <b>0</b>  | 13  |
| cytolysis                                                        | 5         |            |           |           |           |     |
| <b>General</b>                                                   | <b>0</b>  | <b>0</b>   | <b>0</b>  | <b>0</b>  | <b>0</b>  | 2   |
| none                                                             |           |            |           |           |           |     |
| <b>Cell communication</b>                                        | <b>0</b>  | <b>9</b>   | <b>6</b>  | <b>10</b> | <b>4</b>  | 381 |
| <b>Intercellular signaling</b>                                   | <b>0</b>  | <b>0</b>   | <b>0</b>  | <b>1</b>  | <b>0</b>  | 16  |
| synaptic transmission; cholinergic                               |           |            |           | 1         |           |     |
| <b>Signal transduction</b>                                       | <b>0</b>  | <b>9</b>   | <b>6</b>  | <b>9</b>  | <b>4</b>  | 365 |
| activation of MAPKK activity                                     |           |            |           | 1         |           |     |
| estrogen receptor signaling pathway                              |           | 2          |           | 1         |           |     |
| G-protein signaling; coupled to cGMP nucleotide second messenger |           | 2          |           |           |           |     |
| negative regulation of protein kinase activity                   |           |            |           | 2         | 2         |     |
| negative regulation of signal transduction                       |           |            |           | 2         |           |     |
| nitric oxide mediated signal transduction                        |           |            | 1         | 1         | 1         |     |
| positive regulation of protein kinase activity                   |           |            |           | 1         |           |     |
| Ras protein signal transduction                                  |           | 5          |           |           |           |     |
| regulation of MAPK activity                                      |           |            | 1         | 1         | 1         |     |
| regulation of Wnt receptor signaling pathway                     |           |            | 1         |           |           |     |
| transmembrane receptor protein tyrosine kinase signaling pathway |           |            | 3         |           |           |     |
| <b>Metabolism</b>                                                | <b>58</b> | <b>113</b> | <b>17</b> | <b>10</b> | <b>31</b> | 828 |
| <b>Proteins, amino acids</b>                                     | <b>0</b>  | <b>12</b>  | <b>0</b>  | <b>4</b>  | <b>3</b>  | 62  |
| glutathione metabolism                                           |           | 4          |           |           |           |     |
| glycine catabolism                                               |           | 2          |           |           |           |     |
| protein polymerization                                           |           |            |           | 4         | 3         |     |
| ubiquitin-dependent protein catabolism                           |           | 6          |           |           |           |     |
| <b>Lipids, fatty acids</b>                                       | <b>14</b> | <b>43</b>  | <b>14</b> | <b>2</b>  | <b>19</b> | 292 |
| acyl-CoA metabolism                                              |           | 4          |           |           | 2         |     |
| bile acid biosynthesis                                           |           |            | 1         |           | 1         |     |
| bile acid metabolism                                             |           | 3          |           |           |           |     |
| cholesterol biosynthesis                                         |           | 5          |           |           |           |     |
| cholesterol metabolism                                           |           | 6          | 3         |           | 3         |     |
| fatty acid alpha-oxidation                                       |           |            | 1         |           |           |     |
| fatty acid biosynthesis                                          |           | 6          |           |           |           |     |
| fatty acid oxidation                                             | 2         |            |           |           |           |     |
| ganglioside biosynthesis                                         |           |            |           |           | 1         |     |
| lipid biosynthesis                                               | 10        | 11         |           |           |           |     |
| lipid metabolism                                                 |           |            | 7         |           | 8         |     |
| negative regulation of lipoprotein lipase activity               |           |            |           | 1         | 1         |     |
| phospholipid biosynthesis                                        |           | 6          |           |           |           |     |
| phospholipid metabolism                                          |           |            | 2         |           |           |     |

|                                                          |           |           |          |          |          |            |
|----------------------------------------------------------|-----------|-----------|----------|----------|----------|------------|
| positive regulation of lipid metabolism                  |           | 2         |          | 1        |          |            |
| regulation of fatty acid metabolism                      | 2         |           |          |          |          |            |
| steroid metabolism                                       |           |           |          |          | 3        |            |
| <b>Carbohydrates</b>                                     | <b>4</b>  | <b>2</b>  | <b>1</b> | <b>1</b> | <b>1</b> | <b>33</b>  |
| gluconeogenesis                                          | 4         |           |          |          |          |            |
| glucuronate metabolism                                   |           |           | 1        |          |          |            |
| glycerol biosynthesis from pyruvate                      |           |           |          |          | 1        |            |
| glycogen biosynthesis                                    |           |           |          | 1        |          |            |
| glyoxylate cycle                                         |           | 2         |          |          |          |            |
| <b>Signaling molecules</b>                               | <b>0</b>  | <b>0</b>  | <b>1</b> | <b>1</b> | <b>0</b> | <b>18</b>  |
| hormone biosynthesis                                     |           |           | 1        |          |          |            |
| negative regulation of nitric oxide biosynthesis         |           |           |          | 1        |          |            |
| <b>Nucleic acid-related</b>                              | <b>3</b>  | <b>2</b>  | <b>0</b> | <b>1</b> | <b>0</b> | <b>32</b>  |
| deoxyribonucleotide catabolism                           |           | 2         |          |          |          |            |
| DNA recombination                                        | 3         |           |          |          |          |            |
| uridine metabolism                                       |           |           |          | 1        |          |            |
| <b>Other</b>                                             | <b>7</b>  | <b>6</b>  | <b>1</b> | <b>0</b> | <b>0</b> | <b>41</b>  |
| aromatic compound catabolism                             | 2         |           |          |          |          |            |
| carotenoid biosynthesis                                  |           | 2         |          |          |          |            |
| glycosaminoglycan catabolism                             |           |           | 1        |          |          |            |
| glycosaminoglycan metabolism                             | 2         | 2         |          |          |          |            |
| isoprenoid biosynthesis                                  |           | 2         |          |          |          |            |
| retinal metabolism                                       | 3         |           |          |          |          |            |
| <b>General</b>                                           | <b>30</b> | <b>48</b> | <b>0</b> | <b>1</b> | <b>8</b> | <b>350</b> |
| ATP biosynthesis                                         |           | 4         |          |          |          |            |
| ATP synthesis coupled proton transport                   |           | 9         |          |          |          |            |
| electron transport                                       | 30        | 35        |          |          | 8        |            |
| regulation of metabolism                                 |           |           |          | 1        |          |            |
| <b>Stress responses</b>                                  | <b>19</b> | <b>13</b> | <b>0</b> | <b>6</b> | <b>2</b> | <b>450</b> |
| <b>Oxidative stress response</b>                         | <b>0</b>  | <b>0</b>  | <b>0</b> | <b>3</b> | <b>0</b> | <b>24</b>  |
| L-ascorbic acid metabolism                               |           |           |          | 1        |          |            |
| response to oxidative stress                             |           |           |          | 2        |          |            |
| <b>Inflammatory response</b>                             | <b>0</b>  | <b>0</b>  | <b>0</b> | <b>0</b> | <b>0</b> | <b>41</b>  |
| none                                                     |           |           |          |          |          |            |
| <b>Immune response</b>                                   | <b>9</b>  | <b>6</b>  | <b>0</b> | <b>2</b> | <b>1</b> | <b>298</b> |
| acute-phase response                                     |           | 6         |          |          |          |            |
| interferon-gamma biosynthesis                            |           |           |          | 1        |          |            |
| interleukin-2 biosynthesis                               | 2         |           |          |          |          |            |
| mast cell activation                                     | 3         |           |          |          |          |            |
| negative regulation of T cell receptor signaling pathway | 2         |           |          |          |          |            |
| regulation of interleukin-6 biosynthesis                 |           |           |          | 1        | 1        |            |
| regulation of macrophage activation                      | 2         |           |          |          |          |            |
| <b>Other</b>                                             | <b>10</b> | <b>7</b>  | <b>0</b> | <b>1</b> | <b>1</b> | <b>87</b>  |
| cellular response to starvation                          |           |           |          | 1        |          |            |
| ER overload response                                     |           |           |          |          | 1        |            |
| response to stress                                       | 4         |           |          |          |          |            |
| response to unfolded protein                             | 6         | 7         |          |          |          |            |

| <b>Organismic regulation</b>        | <b>16</b> | <b>12</b> | <b>3</b> | <b>6</b> | <b>5</b> | <b>166</b> |
|-------------------------------------|-----------|-----------|----------|----------|----------|------------|
| <b>Behavior</b>                     | <b>2</b>  | <b>0</b>  | <b>1</b> | <b>2</b> | <b>0</b> | <b>8</b>   |
| behavior                            | 2         |           |          | 1        |          |            |
| feeding behavior                    |           |           | 1        | 1        |          |            |
| <b>Ontogenesis</b>                  | <b>8</b>  | <b>9</b>  | <b>0</b> | <b>2</b> | <b>1</b> | <b>97</b>  |
| embryo implantation                 | 3         | 3         |          |          |          |            |
| embryonic placenta development      |           |           |          | 1        |          |            |
| epidermis development               | 3         | 3         |          |          |          |            |
| hair follicle morphogenesis         | 2         |           |          |          |          |            |
| odontogenesis                       |           |           |          | 1        | 1        |            |
| positive regulation of angiogenesis |           | 3         |          |          |          |            |
| <b>Systemic regulation</b>          | <b>3</b>  | <b>0</b>  | <b>1</b> | <b>2</b> | <b>4</b> | <b>53</b>  |
| bone mineralization                 |           |           |          | 1        |          |            |
| circadian rhythm                    |           |           |          |          | 2        |            |
| rhythmic process                    | 3         |           |          |          | 2        |            |
| sensory perception                  |           |           |          | 1        |          |            |
| vasodilation                        |           |           | 1        |          |          |            |
| <b>Reproduction</b>                 | <b>3</b>  | <b>3</b>  | <b>1</b> | <b>0</b> | <b>0</b> | <b>8</b>   |
| male sex differentiation            |           |           | 1        |          |          |            |
| sexual reproduction                 | 3         | 3         |          |          |          |            |

**SUPPLEMENTAL TABLE 4. Categorized processes in the lung**

| Categories and subcategories                         | <sup>211</sup> At activity [kBq]: |           |          |          |           | No. (filtered transcripts) |
|------------------------------------------------------|-----------------------------------|-----------|----------|----------|-----------|----------------------------|
|                                                      | 0.064                             | 0.64      | 1.8      | 14       | 42        |                            |
|                                                      | Absorbed dose [mGy]:              |           |          |          |           |                            |
|                                                      | 1.6                               | 16        | 45       | 350      | 1000      |                            |
|                                                      | No. (scored transcripts)          |           |          |          |           |                            |
| <b>DNA integrity</b>                                 | <b>3</b>                          | <b>0</b>  | <b>0</b> | <b>0</b> | <b>0</b>  | <b>109</b>                 |
| <b>Damage and repair</b>                             | <b>0</b>                          | <b>0</b>  | <b>0</b> | <b>0</b> | <b>0</b>  | <b>30</b>                  |
| none                                                 |                                   |           |          |          |           |                            |
| <b>Chromatin organization</b>                        | <b>3</b>                          | <b>0</b>  | <b>0</b> | <b>0</b> | <b>0</b>  | <b>79</b>                  |
| telomere maintenance                                 | 3                                 |           |          |          |           |                            |
| <b>Gene expression integrity</b>                     | <b>30</b>                         | <b>15</b> | <b>2</b> | <b>0</b> | <b>1</b>  | <b>661</b>                 |
| <b>Transcription</b>                                 | <b>0</b>                          | <b>0</b>  | <b>0</b> | <b>0</b> | <b>0</b>  | <b>567</b>                 |
| none                                                 |                                   |           |          |          |           |                            |
| <b>RNA processing</b>                                | <b>21</b>                         | <b>11</b> | <b>2</b> | <b>0</b> | <b>0</b>  | <b>64</b>                  |
| mRNA processing                                      | 10                                | 8         |          |          |           |                            |
| mRNA splice site selection                           | 3                                 | 3         | 2        |          |           |                            |
| nuclear mRNA splicing; via spliceosome               | 6                                 |           |          |          |           |                            |
| regulation of mRNA stability                         | 2                                 |           |          |          |           |                            |
| <b>Translation</b>                                   | <b>9</b>                          | <b>4</b>  | <b>0</b> | <b>0</b> | <b>1</b>  | <b>30</b>                  |
| regulation of protein biosynthesis                   | 5                                 | 4         |          |          |           |                            |
| regulation of translation                            | 4                                 |           |          |          |           |                            |
| translational elongation                             |                                   |           |          |          | 1         |                            |
| <b>Cellular integrity</b>                            | <b>67</b>                         | <b>73</b> | <b>5</b> | <b>8</b> | <b>16</b> | <b>1054</b>                |
| <b>Physico-chemical environment</b>                  | <b>3</b>                          | <b>6</b>  | <b>0</b> | <b>8</b> | <b>6</b>  | <b>174</b>                 |
| anion transport                                      |                                   |           |          | 1        |           |                            |
| calcium ion homeostasis                              |                                   |           |          |          | 2         |                            |
| cation transport                                     |                                   |           |          |          | 2         |                            |
| cell redox homeostasis                               |                                   | 3         |          |          |           |                            |
| copper ion transport                                 |                                   |           |          | 1        |           |                            |
| ion transport                                        |                                   |           |          | 4        |           |                            |
| iron ion homeostasis                                 |                                   |           |          |          | 2         |                            |
| iron ion transport                                   |                                   | 3         |          | 2        |           |                            |
| regulation of pH                                     | 3                                 |           |          |          |           |                            |
| <b>Cytoskeleton &amp; motility</b>                   | <b>24</b>                         | <b>14</b> | <b>5</b> | <b>0</b> | <b>10</b> | <b>139</b>                 |
| chemotaxis                                           | 8                                 | 9         | 3        |          |           |                            |
| cytoskeleton organization and biogenesis             | 11                                |           |          |          | 7         |                            |
| motor axon guidance                                  | 2                                 | 2         |          |          |           |                            |
| muscle thin filament assembly                        |                                   |           |          |          | 1         |                            |
| positive regulation of actin filament polymerization |                                   |           | 1        |          |           |                            |
| regulation of actin filament polymerization          | 3                                 | 3         |          |          |           |                            |
| regulation of locomotion                             |                                   |           | 1        |          | 1         |                            |
| sarcomere alignment                                  |                                   |           |          |          | 1         |                            |
| <b>Extracellular matrix &amp; CM</b>                 | <b>3</b>                          | <b>24</b> | <b>0</b> | <b>0</b> | <b>0</b>  | <b>152</b>                 |
| cell adhesion                                        |                                   | 24        |          |          |           |                            |
| collagen fibril organization                         | 3                                 |           |          |          |           |                            |
| <b>Supramolecular maintenance</b>                    | <b>37</b>                         | <b>29</b> | <b>0</b> | <b>0</b> | <b>0</b>  | <b>589</b>                 |
| protein folding                                      | 16                                | 13        |          |          |           |                            |
| protein modification                                 | 6                                 | 5         |          |          |           |                            |

|                                                          |           |           |           |           |           |            |
|----------------------------------------------------------|-----------|-----------|-----------|-----------|-----------|------------|
| ubiquitin cycle                                          | 15        | 11        |           |           |           |            |
| <b>Cell cycle and differentiation</b>                    | <b>7</b>  | <b>11</b> | <b>6</b>  | <b>2</b>  | <b>4</b>  | <b>510</b> |
| <b>Cell cycle regulation</b>                             | <b>0</b>  | <b>7</b>  | <b>0</b>  | <b>0</b>  | <b>0</b>  | <b>290</b> |
| regulation of cell growth                                |           | 7         |           |           |           |            |
| <b>Differentiation &amp; aging</b>                       | <b>5</b>  | <b>4</b>  | <b>1</b>  | <b>1</b>  | <b>2</b>  | <b>50</b>  |
| cartilage condensation                                   |           |           | 1         | 1         | 1         |            |
| enucleate erythrocyte differentiation                    |           |           |           |           | 1         |            |
| keratinocyte differentiation                             | 5         | 4         |           |           |           |            |
| <b>Apoptotic cell death</b>                              | <b>2</b>  | <b>0</b>  | <b>4</b>  | <b>0</b>  | <b>2</b>  | <b>155</b> |
| anti-apoptosis                                           |           |           |           |           | 2         |            |
| apoptotic mitochondrial changes                          | 2         |           | 1         |           |           |            |
| induction of apoptosis                                   |           |           | 3         |           |           |            |
| <b>Cell death</b>                                        | <b>0</b>  | <b>0</b>  | <b>0</b>  | <b>0</b>  | <b>0</b>  | <b>13</b>  |
| none                                                     |           |           |           |           |           |            |
| <b>General</b>                                           | <b>0</b>  | <b>0</b>  | <b>1</b>  | <b>1</b>  | <b>0</b>  | <b>2</b>   |
| regulation of cellular process                           |           |           | 1         | 1         |           |            |
| <b>Cell communication</b>                                | <b>31</b> | <b>65</b> | <b>17</b> | <b>18</b> | <b>29</b> | <b>381</b> |
| <b>Intercellular signaling</b>                           | <b>2</b>  | <b>0</b>  | <b>5</b>  | <b>0</b>  | <b>5</b>  | <b>16</b>  |
| neuromuscular synaptic transmission                      | 2         |           |           |           |           |            |
| positive regulation of neurotransmitter secretion        |           |           | 1         |           | 1         |            |
| regulation of long-term neuronal synaptic plasticity     |           |           | 1         |           | 1         |            |
| regulation of neurotransmitter secretion                 |           |           | 1         |           | 1         |            |
| synaptic transmission; dopaminergic                      |           |           | 1         |           | 1         |            |
| synaptic vesicle transport                               |           |           | 1         |           | 1         |            |
| <b>Signal transduction</b>                               | <b>29</b> | <b>65</b> | <b>12</b> | <b>18</b> | <b>24</b> | <b>365</b> |
| ER-nuclear signaling pathway                             |           |           |           |           | 1         |            |
| fibroblast growth factor receptor signaling pathway      |           |           |           | 1         | 1         |            |
| peptidyl-serine phosphorylation                          |           |           | 1         |           |           |            |
| peptidyl-threonine phosphorylation                       |           | 2         |           |           |           |            |
| positive regulation of I-kappaB kinase/NF-kappaB cascade |           |           |           | 1         | 1         |            |
| positive regulation of signal transduction               |           |           | 1         | 1         | 1         |            |
| protein amino acid dephosphorylation                     | 8         |           |           |           |           |            |
| <b>Metabolism</b>                                        | <b>15</b> | <b>55</b> | <b>10</b> | <b>11</b> | <b>20</b> | <b>828</b> |
| <b>Proteins, amino acids</b>                             | <b>6</b>  | <b>4</b>  | <b>0</b>  | <b>2</b>  | <b>0</b>  | <b>62</b>  |
| collagen catabolism                                      |           | 4         |           | 2         |           |            |
| ubiquitin-dependent protein catabolism                   | 6         |           |           |           |           |            |
| <b>Lipids, fatty acids</b>                               | <b>0</b>  | <b>8</b>  | <b>5</b>  | <b>4</b>  | <b>5</b>  | <b>292</b> |
| fatty acid elongation                                    |           |           | 1         |           |           |            |
| fatty acid metabolism                                    |           | 8         |           |           |           |            |
| fatty acid oxidation                                     |           |           |           | 1         | 1         |            |
| negative regulation of lipoprotein lipase activity       |           |           | 1         | 1         | 1         |            |
| positive regulation of fatty acid metabolism             |           |           | 1         | 1         | 1         |            |
| positive regulation of lipid metabolism                  |           |           | 1         | 1         | 1         |            |
| triacylglycerol biosynthesis                             |           |           | 1         |           | 1         |            |
| <b>Carbohydrates</b>                                     | <b>0</b>  | <b>3</b>  | <b>4</b>  | <b>3</b>  | <b>4</b>  | <b>33</b>  |
| glucose homeostasis                                      |           | 3         |           |           |           |            |
| glycerol metabolism                                      |           |           | 1         |           | 1         |            |

|                                                           |           |           |           |           |           |            |
|-----------------------------------------------------------|-----------|-----------|-----------|-----------|-----------|------------|
| negative regulation of gluconeogenesis                    |           |           | 1         | 1         | 1         |            |
| positive regulation of glucose import                     |           |           | 1         | 1         | 1         |            |
| response to glucose stimulus                              |           |           | 1         | 1         | 1         |            |
| <b>Signaling molecules</b>                                | <b>0</b>  | <b>2</b>  | <b>1</b>  | <b>0</b>  | <b>2</b>  | <b>18</b>  |
| dopamine biosynthesis                                     |           |           | 1         |           | 1         |            |
| dopamine metabolism                                       |           | 2         |           |           | 1         |            |
| <b>Nucleic acid-related</b>                               | <b>9</b>  | <b>6</b>  | <b>0</b>  | <b>0</b>  | <b>1</b>  | <b>32</b>  |
| mRNA catabolism                                           | 3         |           |           |           |           |            |
| nucleoside metabolism                                     | 3         | 3         |           |           |           |            |
| nucleotide catabolism                                     | 3         | 3         |           |           |           |            |
| RNA-dependent DNA replication                             |           |           |           |           | 1         |            |
| <b>Other</b>                                              | <b>0</b>  | <b>4</b>  | <b>0</b>  | <b>2</b>  | <b>1</b>  | <b>41</b>  |
| peptidoglycan metabolism                                  |           | 4         |           | 2         |           |            |
| phosphocreatine metabolism                                |           |           |           |           | 1         |            |
| <b>General</b>                                            | <b>0</b>  | <b>28</b> | <b>0</b>  | <b>0</b>  | <b>7</b>  | <b>350</b> |
| cellular respiration                                      |           |           |           |           | 1         |            |
| electron transport                                        |           | 28        |           |           | 6         |            |
| <b>Stress responses</b>                                   | <b>21</b> | <b>4</b>  | <b>13</b> | <b>10</b> | <b>8</b>  | <b>450</b> |
| <b>Oxidative stress response</b>                          | <b>0</b>  | <b>0</b>  | <b>0</b>  | <b>0</b>  | <b>0</b>  | <b>24</b>  |
| none                                                      |           |           |           |           |           |            |
| <b>Inflammatory response</b>                              | <b>0</b>  | <b>0</b>  | <b>1</b>  | <b>0</b>  | <b>0</b>  | <b>41</b>  |
| negative regulation of type I hypersensitivity            |           |           | 1         |           |           |            |
| <b>Immune response</b>                                    | <b>8</b>  | <b>0</b>  | <b>6</b>  | <b>8</b>  | <b>4</b>  | <b>298</b> |
| immune response                                           |           |           | 5         | 5         | 4         |            |
| innate immune response                                    |           |           |           | 2         |           |            |
| macrophage differentiation                                |           |           |           | 1         |           |            |
| phagocytosis; engulfment                                  | 4         |           |           |           |           |            |
| phagocytosis; recognition                                 | 4         |           |           |           |           |            |
| protection from natural killer cell mediated cytotoxicity |           |           | 1         |           |           |            |
| <b>Other</b>                                              | <b>13</b> | <b>4</b>  | <b>6</b>  | <b>2</b>  | <b>4</b>  | <b>87</b>  |
| cellular response to starvation                           |           |           |           | 1         | 1         |            |
| response to biotic stimulus                               |           |           |           | 1         |           |            |
| response to drug                                          |           |           |           |           | 1         |            |
| response to heat                                          |           |           | 2         |           |           |            |
| response to hypoxia                                       |           |           | 2         |           | 2         |            |
| response to stress                                        | 5         | 4         |           |           |           |            |
| response to unfolded protein                              | 8         |           | 2         |           |           |            |
| <b>Organismic regulation</b>                              | <b>2</b>  | <b>11</b> | <b>3</b>  | <b>2</b>  | <b>12</b> | <b>166</b> |
| <b>Behavior</b>                                           | <b>0</b>  | <b>0</b>  | <b>0</b>  | <b>0</b>  | <b>0</b>  | <b>8</b>   |
| none                                                      |           |           |           |           |           |            |
| <b>Ontogenesis</b>                                        | <b>2</b>  | <b>7</b>  | <b>3</b>  | <b>1</b>  | <b>3</b>  | <b>97</b>  |
| adult heart development                                   |           |           |           |           | 1         |            |
| ectoderm development                                      |           | 2         |           |           |           |            |
| embryonic development (sensu Mammalia)                    |           |           | 2         |           |           |            |
| positive regulation of angiogenesis                       |           |           |           | 1         | 1         |            |
| skin development                                          | 2         | 2         |           |           |           |            |
| ureteric bud branching                                    |           | 3         |           |           |           |            |

|                                  |          |          |          |          |          |
|----------------------------------|----------|----------|----------|----------|----------|
| visceral muscle development      |          |          | 1        | 1        |          |
| <b>Systemic regulation</b>       | <b>0</b> | <b>0</b> | <b>0</b> | <b>0</b> | <b>9</b> |
| circadian rhythm                 |          |          |          |          | 2        |
| physiological process            |          |          |          |          | 1        |
| regulation of blood vessel size  |          |          |          |          | 1        |
| regulation of muscle contraction |          |          |          |          | 2        |
| rhythmic process                 |          |          |          |          | 2        |
| striated muscle contraction      |          |          |          |          | 1        |
| <b>Reproduction</b>              | <b>0</b> | <b>4</b> | <b>0</b> | <b>1</b> | <b>0</b> |
| germ cell development            |          | 2        |          |          |          |
| male sex differentiation         |          |          |          | 1        |          |
| sexual reproduction              |          | 2        |          |          |          |



**Supplemental Table 5. Categorized processes in the spleen**

| Categories and subcategories                               | <sup>211</sup> At activity [kBq]: |            |          |           |          | No. (filtered transcripts) |
|------------------------------------------------------------|-----------------------------------|------------|----------|-----------|----------|----------------------------|
|                                                            | 0.064                             | 0.64       | 1.8      | 14        | 42       |                            |
|                                                            | Absorbed dose [mGy]:              |            |          |           |          |                            |
|                                                            | 0.45                              | 4.5        | 13       | 98        | 300      |                            |
|                                                            | No. (scored transcripts)          |            |          |           |          |                            |
| <b>DNA integrity</b>                                       | <b>22</b>                         | <b>41</b>  | <b>3</b> | <b>1</b>  | <b>1</b> | <b>109</b>                 |
| <b>Damage and repair</b>                                   | <b>0</b>                          | <b>12</b>  | <b>1</b> | <b>1</b>  | <b>1</b> | <b>30</b>                  |
| base-excision repair; DNA ligation                         |                                   |            |          | 1         |          |                            |
| base-excision repair; gap-filling                          |                                   |            | 1        |           | 1        |                            |
| DNA repair                                                 |                                   | 12         |          |           |          |                            |
| <b>Chromatin organization</b>                              | <b>22</b>                         | <b>29</b>  | <b>2</b> | <b>0</b>  | <b>0</b> | <b>79</b>                  |
| chromosome condensation                                    |                                   |            | 1        |           |          |                            |
| chromosome organization and biogenesis (sensu Eukaryota)   | 10                                | 11         |          |           |          |                            |
| DNA topological change                                     |                                   |            | 1        |           |          |                            |
| establishment and/or maintenance of chromatin architecture |                                   | 3          |          |           |          |                            |
| nucleosome assembly                                        | 12                                | 15         |          |           |          |                            |
| <b>Gene expression integrity</b>                           | <b>234</b>                        | <b>248</b> | <b>2</b> | <b>0</b>  | <b>0</b> | <b>661</b>                 |
| <b>Transcription</b>                                       | <b>161</b>                        | <b>171</b> | <b>0</b> | <b>0</b>  | <b>0</b> | <b>567</b>                 |
| positive regulation of transcription                       | 9                                 |            |          |           |          |                            |
| regulation of transcription; DNA-dependent transcription   | 78                                | 89         |          |           |          |                            |
|                                                            | 74                                | 82         |          |           |          |                            |
| <b>RNA processing</b>                                      | <b>20</b>                         | <b>23</b>  | <b>0</b> | <b>0</b>  | <b>0</b> | <b>64</b>                  |
| mRNA processing                                            | 11                                | 14         |          |           |          |                            |
| nuclear mRNA splicing; via spliceosome                     |                                   | 9          |          |           |          |                            |
| rRNA processing                                            | 9                                 |            |          |           |          |                            |
| <b>Translation</b>                                         | <b>53</b>                         | <b>54</b>  | <b>2</b> | <b>0</b>  | <b>0</b> | <b>30</b>                  |
| none                                                       |                                   |            |          |           |          |                            |
| <b>Cellular integrity</b>                                  | <b>45</b>                         | <b>47</b>  | <b>2</b> | <b>0</b>  | <b>0</b> | <b>1054</b>                |
| <b>Physico-chemical environment</b>                        | <b>8</b>                          | <b>7</b>   | <b>0</b> | <b>0</b>  | <b>0</b> | <b>174</b>                 |
| iron ion homeostasis                                       |                                   | 4          |          |           |          |                            |
| regulation of pH                                           | 3                                 |            |          |           |          |                            |
| release of sequestered calcium ion into cytosol            | 2                                 |            |          |           |          |                            |
| response to pH                                             | 3                                 | 3          |          |           |          |                            |
| <b>Cytoskeleton &amp; motility</b>                         | <b>20</b>                         | <b>21</b>  | <b>0</b> | <b>0</b>  | <b>0</b> | <b>139</b>                 |
| microtubule-based movement                                 | 10                                | 12         |          |           |          |                            |
| microtubule-based process                                  | 8                                 | 9          |          |           |          |                            |
| substrate-bound cell migration; cell extension             | 2                                 |            |          |           |          |                            |
| <b>Extracellular matrix &amp; CM</b>                       | <b>0</b>                          | <b>0</b>   | <b>2</b> | <b>0</b>  | <b>0</b> | <b>152</b>                 |
| cell-matrix adhesion                                       |                                   |            | 2        |           |          |                            |
| <b>Supramolecular maintenance</b>                          | <b>17</b>                         | <b>19</b>  | <b>0</b> | <b>0</b>  | <b>0</b> | <b>589</b>                 |
| ubiquitin cycle                                            | 17                                | 19         |          |           |          |                            |
| <b>Cell cycle and differentiation</b>                      | <b>126</b>                        | <b>190</b> | <b>7</b> | <b>25</b> | <b>2</b> | <b>510</b>                 |
| <b>Cell cycle regulation</b>                               | <b>96</b>                         | <b>133</b> | <b>6</b> | <b>24</b> | <b>2</b> | <b>290</b>                 |
| cell cycle                                                 | 38                                | 52         |          | 9         |          |                            |
| cell cycle arrest                                          |                                   | 7          |          |           |          |                            |
| cell division                                              | 23                                | 28         |          |           |          |                            |

|                                                           |           |            |           |           |           |            |
|-----------------------------------------------------------|-----------|------------|-----------|-----------|-----------|------------|
| chromosome segregation                                    |           | 4          |           | 2         |           |            |
| DNA replication                                           | 15        | 19         | 3         | 8         |           |            |
| DNA replication initiation                                | 7         | 7          | 2         | 3         |           |            |
| dTMP biosynthesis                                         |           |            |           | 1         |           |            |
| mitosis                                                   | 13        | 16         |           |           |           |            |
| positive regulation of cell growth                        |           |            |           |           | 1         |            |
| regulation of DNA replication                             |           |            | 1         | 1         | 1         |            |
| <b>Differentiation &amp; aging</b>                        | <b>6</b>  | <b>4</b>   | <b>1</b>  | <b>1</b>  | <b>0</b>  | <b>50</b>  |
| cartilage condensation                                    |           |            | 1         | 1         |           |            |
| epithelial to mesenchymal transition                      | 2         |            |           |           |           |            |
| keratinocyte differentiation                              | 4         | 4          |           |           |           |            |
| <b>Apoptotic cell death</b>                               | <b>24</b> | <b>53</b>  | <b>0</b>  | <b>0</b>  | <b>0</b>  | <b>155</b> |
| anti-apoptosis                                            |           | 10         |           |           |           |            |
| apoptosis                                                 | 24        | 28         |           |           |           |            |
| induction of apoptosis                                    |           | 15         |           |           |           |            |
| <b>Cell death</b>                                         | <b>0</b>  | <b>0</b>   | <b>0</b>  | <b>0</b>  | <b>0</b>  | <b>13</b>  |
| none                                                      |           |            |           |           |           |            |
| <b>General</b>                                            | <b>0</b>  | <b>0</b>   | <b>0</b>  | <b>0</b>  | <b>0</b>  | <b>2</b>   |
| none                                                      |           |            |           |           |           |            |
| <b>Cell communication</b>                                 | <b>25</b> | <b>24</b>  | <b>1</b>  | <b>0</b>  | <b>1</b>  | <b>381</b> |
| <b>Intercellular signaling</b>                            | <b>4</b>  | <b>0</b>   | <b>0</b>  | <b>0</b>  | <b>0</b>  | <b>16</b>  |
| neuromuscular synaptic transmission                       | 2         |            |           |           |           |            |
| synaptic vesicle transport                                | 2         |            |           |           |           |            |
| <b>Signal transduction</b>                                | <b>21</b> | <b>24</b>  | <b>1</b>  | <b>0</b>  | <b>1</b>  | <b>365</b> |
| cell surface receptor linked signal transduction          | 12        | 17         |           |           |           |            |
| peptidyl-serine phosphorylation                           | 2         |            |           |           |           |            |
| positive regulation of phosphoinositide 3-kinase activity |           |            | 1         |           | 1         |            |
| Ras protein signal transduction                           | 7         | 7          |           |           |           |            |
| <b>Metabolism</b>                                         | <b>45</b> | <b>158</b> | <b>23</b> | <b>36</b> | <b>19</b> | <b>828</b> |
| <b>Proteins, amino acids</b>                              | <b>0</b>  | <b>0</b>   | <b>1</b>  | <b>6</b>  | <b>1</b>  | <b>62</b>  |
| asparagine biosynthesis                                   |           |            |           | 1         |           |            |
| collagen catabolism                                       |           |            |           | 2         |           |            |
| protein amino acid esterification                         |           |            | 1         | 1         | 1         |            |
| protein amino acid glycosylation                          |           |            |           | 2         |           |            |
| <b>Lipids, fatty acids</b>                                | <b>0</b>  | <b>3</b>   | <b>11</b> | <b>9</b>  | <b>12</b> | <b>292</b> |
| ceramide catabolism                                       |           |            | 1         | 1         | 1         |            |
| ceramide metabolism                                       |           | 3          |           |           |           |            |
| cholesterol absorption                                    |           |            | 1         | 1         | 1         |            |
| cholesterol catabolism                                    |           |            |           |           | 1         |            |
| fatty acid catabolism                                     |           |            | 1         |           | 1         |            |
| lipid catabolism                                          |           |            | 5         | 5         | 5         |            |
| negative regulation of lipoprotein lipase activity        |           |            | 1         | 1         | 1         |            |
| phospholipid catabolism                                   |           |            | 1         | 1         | 1         |            |
| positive regulation of lipid metabolism                   |           |            | 1         |           | 1         |            |
| <b>Carbohydrates</b>                                      | <b>0</b>  | <b>0</b>   | <b>0</b>  | <b>0</b>  | <b>0</b>  | <b>33</b>  |
| none                                                      |           |            |           |           |           |            |
| <b>Signaling molecules</b>                                | <b>2</b>  | <b>0</b>   | <b>0</b>  | <b>0</b>  | <b>0</b>  | <b>18</b>  |

|                                                   |           |            |           |           |          |            |
|---------------------------------------------------|-----------|------------|-----------|-----------|----------|------------|
| positive regulation of nitric oxide biosynthesis  | 2         |            |           |           |          |            |
| <b>Nucleic acid-related</b>                       | <b>0</b>  | <b>0</b>   | <b>0</b>  | <b>0</b>  | <b>0</b> | 32         |
| none                                              |           |            |           |           |          |            |
| <b>Other</b>                                      | <b>0</b>  | <b>0</b>   | <b>0</b>  | <b>0</b>  | <b>0</b> | 41         |
| none                                              |           |            |           |           |          |            |
| <b>General</b>                                    | <b>43</b> | <b>155</b> | <b>11</b> | <b>21</b> | <b>6</b> | 350        |
| none                                              |           |            |           |           |          |            |
| <b>Stress responses</b>                           | <b>43</b> | <b>132</b> | <b>7</b>  | <b>11</b> | <b>6</b> | <b>450</b> |
| <b>Oxidative stress response</b>                  | <b>0</b>  | <b>3</b>   | <b>2</b>  | <b>2</b>  | <b>0</b> | 24         |
| hydrogen peroxide catabolism                      |           | 3          | 2         | 2         |          |            |
| <b>Inflammatory response</b>                      | <b>0</b>  | <b>17</b>  | <b>0</b>  | <b>6</b>  | <b>3</b> | 41         |
| arachidonic acid secretion                        |           |            |           | 1         |          |            |
| inflammatory response                             |           | 17         |           | 5         | 3        |            |
| <b>Immune response</b>                            | <b>43</b> | <b>98</b>  | <b>3</b>  | <b>2</b>  | <b>2</b> | 298        |
| acute-phase response                              |           |            | 3         |           | 2        |            |
| B cell receptor signaling pathway                 | 2         |            |           |           |          |            |
| cytokinesis                                       |           |            |           | 2         |          |            |
| defense response                                  |           | 17         |           |           |          |            |
| immune response                                   | 32        | 40         |           |           |          |            |
| immunoglobulin secretion                          |           | 4          |           |           |          |            |
| macrophage differentiation                        | 3         |            |           |           |          |            |
| negative thymic T cell selection                  |           | 3          |           |           |          |            |
| phagocytosis; engulfment                          |           | 5          |           |           |          |            |
| phagocytosis; recognition                         |           | 4          |           |           |          |            |
| positive regulation of B cell proliferation       |           | 4          |           |           |          |            |
| positive regulation of interleukin-4 biosynthesis | 2         |            |           |           |          |            |
| positive regulation of T cell differentiation     |           | 4          |           |           |          |            |
| positive regulation of T cell proliferation       |           | 6          |           |           |          |            |
| regulation of immune response                     | 4         | 4          |           |           |          |            |
| regulation of T cell differentiation              |           | 3          |           |           |          |            |
| T cell receptor signaling pathway                 |           | 4          |           |           |          |            |
| <b>Other</b>                                      | <b>0</b>  | <b>14</b>  | <b>2</b>  | <b>1</b>  | <b>1</b> | 87         |
| cellular response to starvation                   |           |            | 2         |           | 1        |            |
| response to biotic stimulus                       |           |            |           | 1         |          |            |
| response to DNA damage stimulus                   |           | 11         |           |           |          |            |
| response to drug                                  |           | 3          |           |           |          |            |
| <b>Organismic regulation</b>                      | <b>0</b>  | <b>8</b>   | <b>4</b>  | <b>5</b>  | <b>3</b> | <b>166</b> |
| <b>Behavior</b>                                   | <b>0</b>  | <b>0</b>   | <b>0</b>  | <b>0</b>  | <b>0</b> | 8          |
| none                                              |           |            |           |           |          |            |
| <b>Ontogenesis</b>                                | <b>0</b>  | <b>8</b>   | <b>1</b>  | <b>1</b>  | <b>0</b> | 97         |
| embryonic cleavage                                |           |            | 1         | 1         |          |            |
| embryonic development                             |           | 8          |           |           |          |            |
| <b>Systemic regulation</b>                        | <b>0</b>  | <b>0</b>   | <b>3</b>  | <b>3</b>  | <b>3</b> | 53         |
| digestion                                         |           |            | 3         | 3         | 3        |            |
| <b>Reproduction</b>                               | <b>0</b>  | <b>0</b>   | <b>0</b>  | <b>1</b>  | <b>0</b> | 8          |
| meiotic chromosome segregation                    |           |            |           | 1         |          |            |
